# Supplementary material for: Transplantation of human neural progenitor cells secreting GDNF into the spinal cord of patients with ALS: a phase 1/2a trial
Source: PubMed Central journal article supplement (PMC9499868; doi:10.1038/s41591-022-01956-3), 2022-09-05
Supplement: 41591_2022_1956_MOESM1_ESM.pdf [file 41591_2022_1956_MOESM1_ESM.pdf]

---

**Supplementary information**

---

**Transplantation of human neural progenitor cells secreting GDNF into the spinal cord of patients with ALS: a phase 1/2a trial**

---

In the format provided by the authors and unedited

| Subject | Side                          | Description                               | Severity | Outcome*           | Start (Post-op | Stop (Post-op |
|---------|-------------------------------|-------------------------------------------|----------|--------------------|----------------|---------------|
|         |                               |                                           |          |                    | Day)           | day)          |
| 101     | Treated                       | Leg Pain - Needles                        | 8        | Change in Severity | 0              | 3             |
|         | Treated                       | Leg Pain - Needles                        | 3        | Ongoing            | 3              | -             |
|         | Bilateral                     | Leg Pain - Aching                         | 5        | Ongoing            | 594            | -             |
| 102     | Treated                       | Foot Numbness/Tingling                    | 2        | Change in Severity | 0              | 170           |
|         | Treated                       | Leg Numbness/Tingling                     | 5        | Resolved           | 170            | 215           |
|         | Treated                       | Foot Numbness                             | Moderate | Resolved           | 160            | 215           |
|         | Untreated                     | Leg Pain - Dull                           | 2        | Resolved           | 179            | 179           |
|         | Bilateral                     | Leg Pain - Dull                           | 3        | Ongoing            | 335            | -             |
| 103     | Treated                       | Knee Pain (Intermittent) - Sharp          | 4        | Ongoing            | 95             | -             |
|         | Treated                       | Leg Soreness                              | 4        | Ongoing            | 40             | -             |
|         | Treated                       | Leg Pain - Burning                        | 7        | Change in Severity | 246            | 338           |
|         | Treated                       | Leg Pain - Dull Burning                   | 3        | Ongoing            | 338            | -             |
| 104     | Treated                       | Leg Pain - Aching                         | 7        | Change in Severity | 0              | 1             |
|         | Treated                       | Leg Pain - Aching                         | 3        | Change in Severity | 1              | 3             |
|         | Treated                       | Leg Pain - Aching                         | 6        | Resolved           | 3              | 152           |
|         | Treated                       | Foot Pain (intermittent) - Aching         | 6        | Resolved           | 1              | 61            |
|         | Untreated                     | Foot Pain - Sharp                         | 8        | Resolved           | 68             | 319           |
| 105     | Treated                       | Thigh Pain - Pins and needles             | 5        | Change in Severity | 26             | 47            |
|         | Treated                       | Thigh Pain - Pins and needles             | 2        | Ongoing            | 47             | -             |
| 106     | Treated                       | Leg Pain - Aching                         | 7        | Resolved           | 0              | 2             |
|         | Bilateral                     | Leg Pain - Shooting                       | 4        | Resolved           | 8              | 11            |
|         | Treated                       | Leg Pain - Stabbing/Burning               | 6        | Resolved           | 214            | 275           |
|         | Bilateral                     | Leg - Loss of pin sensation               | Mild     | Ongoing            | 180            | -             |
| 107     | Treated                       | Calf Pain - Shooting                      | 5        | Resolved           | 0              | 5             |
|         | Treated                       | Knee Pain - Shooting                      | 8        | Resolved           | 0              | 5             |
|         | Treated                       | Foot Pain - Shooting                      | 8        | Resolved           | 0              | 7             |
|         | Bilateral                     | Leg Pain - Bee Stings/Pin Pricks          | 7        | Change in Severity | 55             | 58            |
|         | Bilateral                     | Leg Pain - Sharp                          | 4        | Change in Severity | 58             | 91            |
|         | Bilateral                     | Leg Pain - Ant bites                      | 9        | Change in Severity | 91             | 91            |
|         | Bilateral                     | Leg Pain - Ant bites                      | 3        | Resolved           | 91             | 113           |
| Treated | Leg - Decreased pin sensation | Mild                                      | Resolved | 33                 | 92             |               |
| 108     | Untreated                     | Leg Pain - Aching                         | 5        | Resolved           | 47             | 77            |
| 109     | Treated                       | Leg Pain - Stabbing                       | 5        | Resolved           | 0              | 7             |
|         | Bilateral                     | Calf Cramping (Intermittent)              | 8        | Ongoing            | 245            | -             |
|         | Bilateral                     | Leg Soreness                              | 3        | Ongoing            | 337            | -             |
|         | Untreated                     | Leg Itching (Intermittent)                | Moderate | Resolved           | 28             | 43            |
|         | Treated                       | Leg Itching (Intermittent)                | Severe   | Change in Severity | 28             | 43            |
|         | Treated                       | Leg Itching (Intermittent)                | Mild     | Resolved           | 43             | 184           |
| 110     | Treated                       | Thigh Pain - Shooting                     | 5        | Resolved           | 0              | 8             |
|         | Treated                       | Thigh Tingling                            | 5        | Resolved           | 0              | 8             |
|         | Treated                       | Lower Leg Pain - Pins and Needles         | 5        | Ongoing            | 5              | -             |
|         | Bilateral                     | Cramping                                  | 7        | Ongoing            | 95             | -             |
|         | Bilateral                     | Leg - Decreased pin sensation             | Mild     | Resolved           | 2              | 265           |
| 111     | Untreated                     | Radiating when laying Down                | 2        | Resolved           | 222            | 371           |
|         | Treated                       | Radiating when laying Down                | 2        | Resolved           | 222            | 371           |
|         | Treated                       | Radiating warmth from hip to knee         | 3        | Ongoing            | 19             | -             |
|         | Bilateral                     | Leg - Decreased pin sensation             | Mild     | Ongoing            | 34             | -             |
| 112     | Treated                       | Lower Leg Tingling                        | 5        | Resolved           | 0              | 3             |
| 113     | Treated                       | Leg Pain - Shooting/Tingling              | 5        | Ongoing            | 0              | -             |
|         | Untreated                     | Leg - Stabbing                            | 8        | Ongoing            | 18             | -             |
| 114     | Treated                       | Thigh Pain - Shooting                     | 8        | Change in Severity | 1              | 32            |
|         | Treated                       | Thigh Pain - Shooting                     | 9        | Change in Severity | 32             | 58            |
|         | Treated                       | Thigh Pain - Shooting                     | 8        | Change in Severity | 58             | 94            |
|         | Treated                       | Thigh Pain - Shooting                     | 3        | Change in Severity | 94             | 208           |
|         | Treated                       | Thigh Pain - Shooting                     | 7        | Ongoing            | 208            | -             |
|         | Treated                       | Leg Pain - Aching                         | 9        | Ongoing            | 185            | -             |
|         | Treated                       | Thigh Itching                             | Moderate | Ongoing            | 2              | -             |
|         | Treated                       | Thigh Hyperesthesia                       | Moderate | Change in Severity | 2              | 58            |
|         | Treated                       | Thigh Hyperesthesia                       | Mild     | Ongoing            | 58             | -             |
|         | Bilateral                     | Leg - Decreased pin sensation             | Mild     | Ongoing            | 33             | -             |
| 115     | Treated                       | Leg Pain - Burning                        | 7        | Resolved           | 0              | 504           |
| 116     | Untreated                     | Leg Pain - Aching                         | 2        | Resolved           | 0              | 2             |
|         | Treated                       | Leg - Decreased pin sensation             | Mild     | Resolved           | 40             | 61            |
| 118     | Treated                       | Foot Pain (intermittent)-Burning/Tingling | 1        | Resolved           | 1              | 99            |

\*Resolved = Resolved without sequela(e), Ongoing = Condition still present as of last contact.

9/18 participants had lower extremity pain on the treated side lasting longer than 6 months, of which 5 had pain  $\geq 5$  in severity

**Supp Table 1.** Detailed sensory changes reported by participants throughout the study.

| Subject | Gabapentin Dose | Start (Post-op Day) | End (Post-op Day) |
|---------|-----------------|---------------------|-------------------|
| 101     | -               | -                   | -                 |
| 102     | 300mg           | 5                   | 91                |
| 103     | 600mg           | -1274               | 0                 |
|         | 1800mg          | 0                   | 1                 |
|         | 1200mg          | 1                   | Ongoing           |
| 104     | 900mg           | 0                   | 33                |
|         | 300mg           | 62                  | 450               |
| 105     | 900mg           | 1                   | 5                 |
|         | 300mg           | 180                 | 182               |
|         | 600mg           | 182                 | 184               |
|         | 900mg           | 184                 | 195               |
| 106     | 300mg           | 0                   | 5                 |
| 107     | 900mg           | 1                   | 5                 |
|         | 300mg           | 63                  | 82                |
|         | 300mg           | 263                 | Ongoing           |
| 108     | 600mg*          | 0                   | 0                 |
| 109     | 900mg           | 1                   | 21                |
|         | 900mg           | 43                  | Ongoing           |
| 110     | 600mg           | 1                   | 5                 |
|         | 600mg           | 43                  | Ongoing           |
| 111     | -               | -                   | -                 |
| 112     | 100mg           | 331                 | Ongoing           |
| 113     | 600mg           | 0                   | 5                 |
|         | 600mg           | 11                  | Ongoing           |
| 114     | 1200mg          | 63                  | Ongoing           |
| 115     | 1200mg          | 0                   | .                 |
| 116     | 600mg*          | 0                   | 0                 |
| 117     | -               | -                   | -                 |
| 118     | 800mg*          | 0                   | 0                 |
|         | 600mg           | 2                   | 5                 |

\*Single Dose

**Supp Table 2.** Dosage and duration of Gabapentin use by participants in the trial.

### Primary antibodies for dose ranging and pig studies

| Antibody <sup>1</sup>     | Dilution Rats | Dilution Pigs | Company       | Catalogue # |
|---------------------------|---------------|---------------|---------------|-------------|
| Human nuclei (Stem101)    | 1:200         | Not used      | Takara        | Y40400      |
| Human cytoplasm (Stem121) | 1:2000        | 1:750         | Takara        | Y40410      |
| Human nestin              | 1:15,000      | 1:8000        | EMD Millipore | ABD69       |
| GFAP                      | 1:500         | Not used      | Dako          | Z0334       |
| Human GFAP (Stem 123)     | Not used      | 1:1500        | Takara        | Y40420      |
| ChAT                      | 1:200         | Not used      | EMD Millipore | AB144P      |
| GDNF                      | 1:250         | 1:200         | R&D Systems   | BAF212      |
| AQP4                      | 1:100         | Not used      | Sigma         | HPA014784   |
| Glast                     | 1:20          | Not used      | R&D Systems   | AF6048      |

<sup>1</sup>Incubated overnight at room temperature

### Primary antibodies for human spinal cord

| Primary Antibody <sup>1</sup> | Dilution | Duration    | Company           | Catalog #       |
|-------------------------------|----------|-------------|-------------------|-----------------|
| Human GDNF (biotinylated)     | 1:50     | 24 hours    | R&D Systems       | BAF212          |
| Human-specific ChAT           | 1:200    | 48–72 hours | R&D Systems       | AF3447          |
| IBA1                          | 1:250    | Overnight   | Novus Bio         | NB100-1028      |
| Human-specific Nestin         | 1:2000   | Overnight   | EMD Millipore     | ABD69           |
| GFAP                          | 1:500    | Overnight   | Dako              | Z0334           |
| Ki-67                         | 1:200    | Overnight   | Thermo Scientific | RM-9106-S       |
| CD34                          | 1:500    | Overnight   | Abnova            | PAB18289        |
| Collagen IV                   | 1:150    | Overnight   | Rockland          | 600-401-106-0.1 |
| S100b                         | 1:100    | Overnight   | Sigma-Aldrich     | HPA015768       |
| Human-specific NF-H           | 1:4000   | Overnight   | R&D Systems       | AF3108          |

<sup>1</sup>Incubated at 4°C, except GDNF at room temperature

**Supp Table 3.** Antibody details
