# Supplementary material for: Transplantation of human neural progenitor cells secreting GDNF into the spinal cord of patients with ALS: a phase 1/2a trial
Source: PubMed Central journal article supplement (PMC9499868; doi:10.1038/s41591-022-01956-3), 2022-09-05
Supplement: 41591_2022_1956_MOESM2_ESM.pdf [file 41591_2022_1956_MOESM2_ESM.pdf]

## Reporting Summary

Nature Portfolio wishes to improve the reproducibility of the work that we publish. This form provides structure for consistency and transparency in reporting. For further information on Nature Portfolio policies, see our [Editorial Policies](#) and the [Editorial Policy Checklist](#).

### Statistics

For all statistical analyses, confirm that the following items are present in the figure legend, table legend, main text, or Methods section.

n/a Confirmed

- The exact sample size ( $n$ ) for each experimental group/condition, given as a discrete number and unit of measurement
- A statement on whether measurements were taken from distinct samples or whether the same sample was measured repeatedly
- The statistical test(s) used AND whether they are one- or two-sided  
*Only common tests should be described solely by name; describe more complex techniques in the Methods section.*
- A description of all covariates tested
- A description of any assumptions or corrections, such as tests of normality and adjustment for multiple comparisons
- A full description of the statistical parameters including central tendency (e.g. means) or other basic estimates (e.g. regression coefficient) AND variation (e.g. standard deviation) or associated estimates of uncertainty (e.g. confidence intervals)
- For null hypothesis testing, the test statistic (e.g.  $F$ ,  $t$ ,  $r$ ) with confidence intervals, effect sizes, degrees of freedom and  $P$  value noted  
*Give  $P$  values as exact values whenever suitable.*
- For Bayesian analysis, information on the choice of priors and Markov chain Monte Carlo settings
- For hierarchical and complex designs, identification of the appropriate level for tests and full reporting of outcomes
- Estimates of effect sizes (e.g. Cohen's  $d$ , Pearson's  $r$ ), indicating how they were calculated

*Our web collection on [statistics for biologists](#) contains articles on many of the points above.*

### Software and code

Policy information about [availability of computer code](#)

Data collection

Data analysis

For manuscripts utilizing custom algorithms or software that are central to the research but not yet described in published literature, software must be made available to editors and reviewers. We strongly encourage code deposition in a community repository (e.g. GitHub). See the Nature Portfolio [guidelines for submitting code & software](#) for further information.

### Data

Policy information about [availability of data](#)

All manuscripts must include a [data availability statement](#). This statement should provide the following information, where applicable:

- Accession codes, unique identifiers, or web links for publicly available datasets
- A description of any restrictions on data availability
- For clinical datasets or third party data, please ensure that the statement adheres to our [policy](#)

All requests for raw and analyzed data and materials are promptly reviewed by the Cedars-Sinai Board of Governors Institute of Regenerative Medicine to verify if the request is subject to any intellectual property or confidentiality obligations. Patient-related data not included in the paper were generated as part of clinical trials and may be subject to patient confidentiality. Any data and materials that can be shared will be released via a Material Transfer Agreement. All raw and analyzed sequencing data can be found at the NCBI Sequence Read Archive (accession number: pending).

## Field-specific reporting

Please select the one below that is the best fit for your research. If you are not sure, read the appropriate sections before making your selection.

Life sciences       Behavioural & social sciences       Ecological, evolutionary & environmental sciences

For a reference copy of the document with all sections, see [nature.com/documents/nr-reporting-summary-flat.pdf](https://www.nature.com/documents/nr-reporting-summary-flat.pdf)

## Life sciences study design

All studies must disclose on these points even when the disclosure is negative.

|                 |                             |
|-----------------|-----------------------------|
| Sample size     | Detailed in methods section |
| Data exclusions | Detailed in methods section |
| Replication     | Detailed in methods section |
| Randomization   | Detailed in methods section |
| Blinding        | Detailed in methods section |

## Reporting for specific materials, systems and methods

We require information from authors about some types of materials, experimental systems and methods used in many studies. Here, indicate whether each material, system or method listed is relevant to your study. If you are not sure if a list item applies to your research, read the appropriate section before selecting a response.

### Materials & experimental systems

### Methods

| n/a                                 | Involved in the study                                           | n/a                                 | Involved in the study                                      |
|-------------------------------------|-----------------------------------------------------------------|-------------------------------------|------------------------------------------------------------|
| <input type="checkbox"/>            | <input checked="" type="checkbox"/> Antibodies                  | <input checked="" type="checkbox"/> | <input type="checkbox"/> ChIP-seq                          |
| <input type="checkbox"/>            | <input checked="" type="checkbox"/> Eukaryotic cell lines       | <input checked="" type="checkbox"/> | <input type="checkbox"/> Flow cytometry                    |
| <input checked="" type="checkbox"/> | <input type="checkbox"/> Palaeontology and archaeology          | <input type="checkbox"/>            | <input checked="" type="checkbox"/> MRI-based neuroimaging |
| <input type="checkbox"/>            | <input checked="" type="checkbox"/> Animals and other organisms |                                     |                                                            |
| <input type="checkbox"/>            | <input checked="" type="checkbox"/> Human research participants |                                     |                                                            |
| <input type="checkbox"/>            | <input checked="" type="checkbox"/> Clinical data               |                                     |                                                            |
| <input checked="" type="checkbox"/> | <input type="checkbox"/> Dual use research of concern           |                                     |                                                            |

## Antibodies

### Antibodies used

Human nuclei (Stem101) 1:200 ab-101-u-050 Takara Bio  
 Human cytoplasm (Stem121) 1:2000 ab-121-u-050 Takara Bio  
 Human-specific Nestin 1:15,000 ABD69 EMD Millipore  
 GFAP 1:500 Z0334 Dako  
 ChAT 1:200 AB144P-1ML EMD Millipore  
 GDNF 1:250 BAF212 R&D Systems  
 AQP4 1:100 HPA014784 Sigma  
 Glast 1:20 AF6048 R&D Systems  
 Human-specific GDNF (biotinylated) 1:50 BAF212 R&D Systems  
 Human-specific ChAT 1:200 AF3447 R&D Systems  
 Iba-1 1:250 NB100-1028 Novus Bio  
 Human-specific Nestin 1:2000 ABD69 EMD Millipore  
 GFAP 1:500 Z0334 Dako  
 Ki-67 1:200 RM-9106-S Thermo Scientific  
 CD34 1:500 PAB18289 Abnova  
 Collagen IV 1:150 600-401-106-0.1 Rockland  
 S100B 1:100 HPA015768 Sigma-Aldrich  
 Human-specific NF-H 1:4000 AF3108 R&D Systems

### Validation

Antibodies were validated and optimized based on the manufacturer's recommendations and using known positive controls.

## Eukaryotic cell lines

Policy information about [cell lines](#)

|                                                                      |                                                                                                       |
|----------------------------------------------------------------------|-------------------------------------------------------------------------------------------------------|
| Cell line source(s)                                                  | Tissue Donation obtained by Dr. Guido Nikkah                                                          |
| Authentication                                                       | HLA typing was performed for the line at multiple timepoints during manufacturing for authentication. |
| Mycoplasma contamination                                             | Cell lines are negative for mycoplasma and all adventitious testing                                   |
| Commonly misidentified lines<br>(See <a href="#">ICLAC</a> register) | N/A                                                                                                   |

## Animals and other organisms

Policy information about [studies involving animals](#); [ARRIVE guidelines](#) recommended for reporting animal research

|                         |                                                                                                                                                                                                                                                                                                                                  |
|-------------------------|----------------------------------------------------------------------------------------------------------------------------------------------------------------------------------------------------------------------------------------------------------------------------------------------------------------------------------|
| Laboratory animals      | Male and female SOD1G93A transgenic rats (NTac:SDTg (SOD1G93A) L26H) and wild-type littermates were acquired from Taconics (Hudson, NY, USA) and maintained as a colony by in-house breeding with Sprague-Dawley females (Taconics), Age ~100 days at study start.<br>Female and Male Yucatan Mini Pigs, 14-20Kg at study start. |
| Wild animals            | N/A                                                                                                                                                                                                                                                                                                                              |
| Field-collected samples | N/A                                                                                                                                                                                                                                                                                                                              |
| Ethics oversight        | Detailed in methods section                                                                                                                                                                                                                                                                                                      |

Note that full information on the approval of the study protocol must also be provided in the manuscript.

## Human research participants

Policy information about [studies involving human research participants](#)

|                            |                                                                                             |
|----------------------------|---------------------------------------------------------------------------------------------|
| Population characteristics | Main table 1                                                                                |
| Recruitment                | Detailed in methods section                                                                 |
| Ethics oversight           | Cedars-Sinai Office of Research Compliance and Quality Improvement - Study IRB# Pro00042350 |

Note that full information on the approval of the study protocol must also be provided in the manuscript.

## Clinical data

Policy information about [clinical studies](#)

All manuscripts should comply with the ICMJE [guidelines for publication of clinical research](#) and a completed [CONSORT checklist](#) must be included with all submissions.

|                             |                                                                                                                           |
|-----------------------------|---------------------------------------------------------------------------------------------------------------------------|
| Clinical trial registration | NCT02943850                                                                                                               |
| Study protocol              | Requests can be made to, and promptly reviewed by, the Cedars-Sinai Board of Governors Institute of Regenerative Medicine |
| Data collection             | Detailed in methods section and/or results section                                                                        |
| Outcomes                    | Detailed in methods section and/or results section                                                                        |

## Magnetic resonance imaging

### Experimental design

|                                 |                                                                         |
|---------------------------------|-------------------------------------------------------------------------|
| Design type                     | Longitudinal                                                            |
| Design specifications           | Participants were imaged at different timepoints for safety evaluations |
| Behavioral performance measures | Not Used                                                                |

## Acquisition

|                               |                                                                                                                                                                                                                                                                                                                                                                                                                                                                                                                                      |
|-------------------------------|--------------------------------------------------------------------------------------------------------------------------------------------------------------------------------------------------------------------------------------------------------------------------------------------------------------------------------------------------------------------------------------------------------------------------------------------------------------------------------------------------------------------------------------|
| Imaging type(s)               | <input type="text" value="Structural"/>                                                                                                                                                                                                                                                                                                                                                                                                                                                                                              |
| Field strength                | <input type="text" value="3 Tesla"/>                                                                                                                                                                                                                                                                                                                                                                                                                                                                                                 |
| Sequence & imaging parameters | <input type="text" value="Preoperative thoracolumbar MR in a Siemens Skyra 3T Magnet. The unenhanced spine MR included the following sequences: sagittal T1 turbo spin-echo(tse) 2mm, sagittal T2 tse 2mm, sagittal T2 space 1mm, coronal T2 space 1mm, coronal T1 tse 2mm, axial T2 tse. For postoperative imaging, contrast enhanced MR with sagittal and axial T1 sequences following intravenous Gadovist (gadobutrol, 1.0mmol/mL, a nonionic macrocyclic agent; Bayer Shering Pharma) were added to the unenhanced protocol."/> |
| Area of acquisition           | <input type="text" value="Thoracolumbar"/>                                                                                                                                                                                                                                                                                                                                                                                                                                                                                           |
| Diffusion MRI                 | <input type="checkbox"/> Used <input checked="" type="checkbox"/> Not used                                                                                                                                                                                                                                                                                                                                                                                                                                                           |

## Preprocessing

|                            |                                       |
|----------------------------|---------------------------------------|
| Preprocessing software     | <input type="text" value="Not used"/> |
| Normalization              | <input type="text" value="Not used"/> |
| Normalization template     | <input type="text" value="Not used"/> |
| Noise and artifact removal | <input type="text" value="Not used"/> |
| Volume censoring           | <input type="text" value="Not used"/> |

## Statistical modeling & inference

|                                                                           |                                                                                                       |
|---------------------------------------------------------------------------|-------------------------------------------------------------------------------------------------------|
| Model type and settings                                                   | <input type="text" value="Not used"/>                                                                 |
| Effect(s) tested                                                          | <input type="text" value="Not used"/>                                                                 |
| Specify type of analysis:                                                 | <input type="checkbox"/> Whole brain <input type="checkbox"/> ROI-based <input type="checkbox"/> Both |
| Statistic type for inference<br>(See <a href="#">Eklund et al. 2016</a> ) | <input type="text" value="Not used"/>                                                                 |
| Correction                                                                | <input type="text" value="Not used"/>                                                                 |

## Models & analysis

|                                     |                                                                       |
|-------------------------------------|-----------------------------------------------------------------------|
| n/a                                 | Involvement in the study                                              |
| <input checked="" type="checkbox"/> | <input type="checkbox"/> Functional and/or effective connectivity     |
| <input checked="" type="checkbox"/> | <input type="checkbox"/> Graph analysis                               |
| <input checked="" type="checkbox"/> | <input type="checkbox"/> Multivariate modeling or predictive analysis |
