# Supplementary material for: Transplantation of human neural progenitor cells secreting GDNF into the spinal cord of patients with ALS: a phase 1/2a trial
Source: PubMed Central journal article supplement (PMC9499868; doi:10.1038/s41591-022-01956-3), 2022-09-05

ALS101

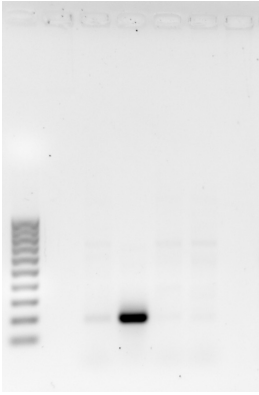

ALS102

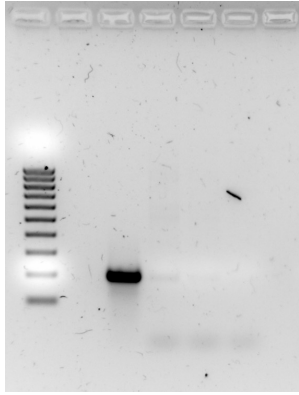

ALS103

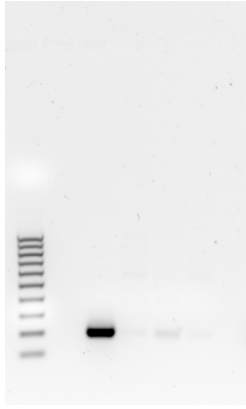

ALS113

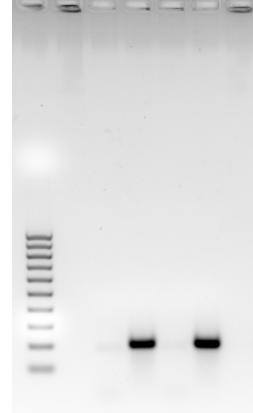

ALS104

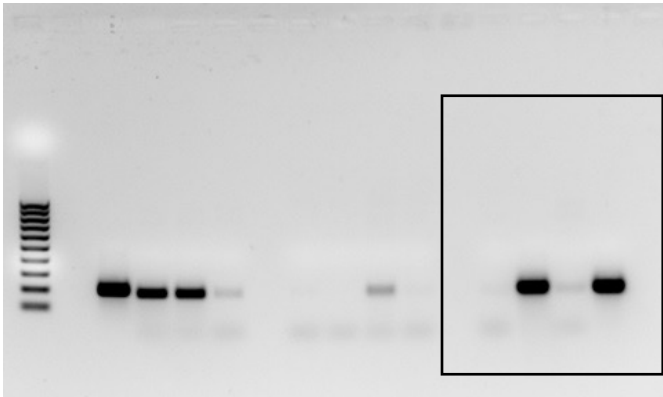

ALS105

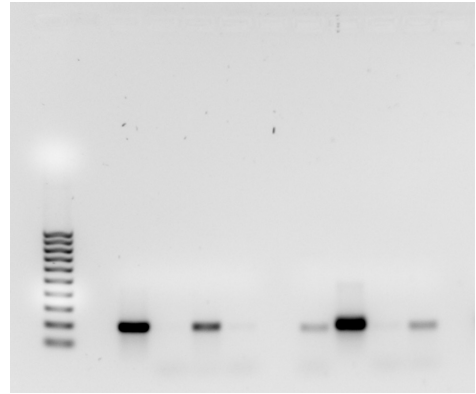

ALS106

ALS107

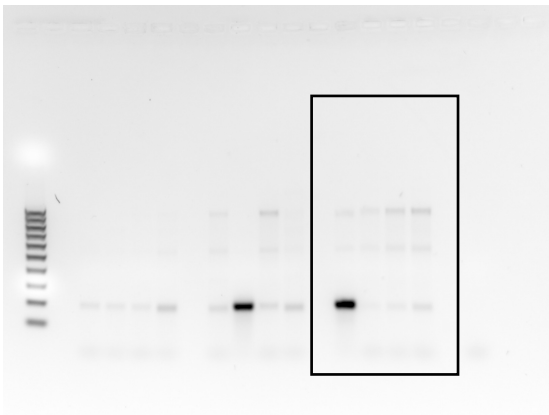

ALS109

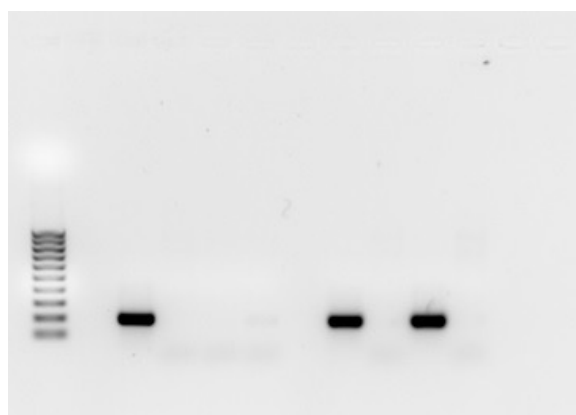

ALS111

ALS114

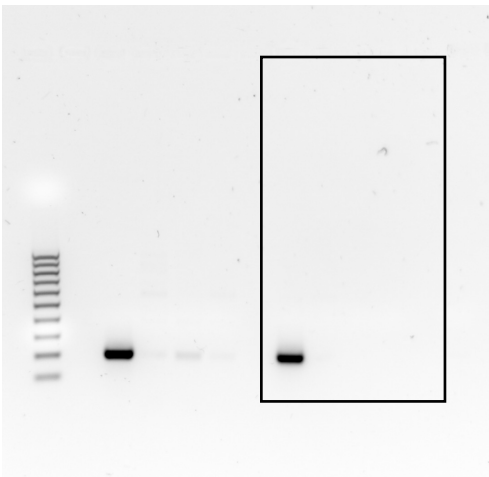

Non-ALS  
Control

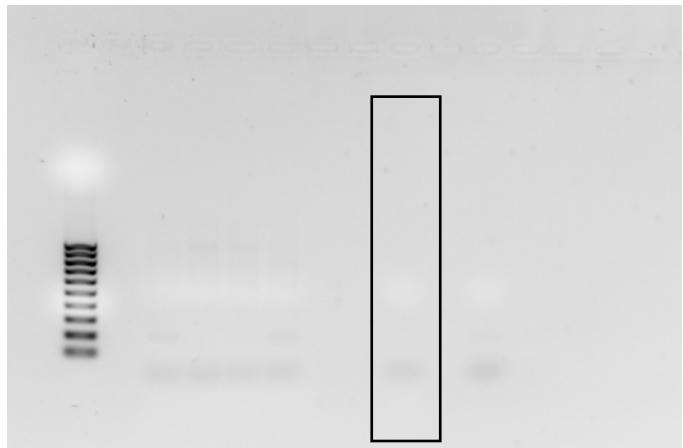

Supplement: 41591_2022_1956_MOESM4_ESM.pdf [file 41591_2022_1956_MOESM4_ESM.pdf]
